# Supplementary material for: Plasma Levels of Endocannabinoids and Their Analogues Are Related to Specific Fecal Bacterial Genera in Young Adults: Role in Gut Barrier Integrity
Source: MDPI journal article supplement (doi:10.3390/nu14102143), 2022-05-20
Supplement: s1 [file s1]

**Table S2.** Partial Spearman correlation of plasma levels of 2-AG and related acylglycerols with plasma levels of lipopolysaccharide adjusted for body mass index.

|                     | <i>2-AG and related acylglycerols<br/>(peak area ratio)</i> |       |        |       |        |       |
|---------------------|-------------------------------------------------------------|-------|--------|-------|--------|-------|
|                     | 2-AG                                                        |       | 2-LG   |       | 2-OG   |       |
|                     | rho                                                         | P     | rho    | P     | rho    | P     |
| LPS<br>N=85 (EU/mL) | 0.032                                                       | 0.765 | -0.005 | 0.966 | -0.060 | 0.575 |

Correlation analyses were performed adjusting for body mass index. Spearman's correlations coefficient (rho) and P-values (P) obtained from univariate Spearman correlation analyses are provided. 2-AG: 2-arachidonylglycerol; 2-LG: 2-linoleoylglycerol; 2-OG: 2-oleoylglycerol; EU: endotoxins units; LPS: lipopolysaccharide.
