# Supplementary material for: Plasma Levels of Endocannabinoids and Their Analogues Are Related to Specific Fecal Bacterial Genera in Young Adults: Role in Gut Barrier Integrity
Source: MDPI journal article supplement (doi:10.3390/nu14102143), 2022-05-20
Supplement: s1 [file s1]

**Table S5.** Spearman correlation of relative abundance of fecal microbiota composition at genera taxonomic level with plasma levels of lipopolysaccharide in participants who showed very low and high values (EU/mL).

|                              | Genera (%)       |               |                    |           |                         |       |                       |           |                    |           |                   |           |
|------------------------------|------------------|---------------|--------------------|-----------|-------------------------|-------|-----------------------|-----------|--------------------|-----------|-------------------|-----------|
|                              | <i>Bilophila</i> |               | <i>Akkermansia</i> |           | <i>Faecalibacterium</i> |       | <i>Parasutterella</i> |           | <i>Odoribacter</i> |           | <i>Prevotella</i> |           |
|                              | rho              | P             | rho                | P         | rho                     | P     | rho                   | P         | rho                | P         | rho               | P         |
| Q1:<br>Low<br>LPS<br>(N=19)  | -<br>0.67<br>9   | <b>≤0.001</b> | 0.32<br>0          | 0.18<br>1 | 0.244                   | 0.313 | 0.07<br>0             | 0.77<br>5 | 0.23<br>6          | 0.33<br>0 | -<br>0.27<br>8    | 0.24<br>9 |
| Q4:<br>High<br>LPS<br>(N=21) | -<br>0.20<br>1   | 0.383         | 0.03<br>6          | 0.87<br>8 | -0.315                  | 0.164 | -<br>0.12<br>6        | 0.58<br>6 | -<br>0.26<br>3     | 0.25<br>0 | 0.00<br>3         | 0.98<br>9 |

Spearman's correlations coefficient (rho) and P-values (P) obtained from univariate Spearman correlation analyses are provided. EU: endotoxins units; LPS: lipopolysaccharide; Q: quartile.
