# Supplementary material for: Plasma Levels of Endocannabinoids and Their Analogues Are Related to Specific Fecal Bacterial Genera in Young Adults: Role in Gut Barrier Integrity
Source: MDPI journal article supplement (doi:10.3390/nu14102143), 2022-05-20
Supplement: s1 [file s1]

**Table S3.** Characteristics of the individuals according to quartiles of plasma levels of lipopolysaccharide.

|                                                                         | Quartiles of plasma levels of LPS  |              |                                 |           |                                 |  |                                    |               |  |           | p-value      |             |
|-------------------------------------------------------------------------|------------------------------------|--------------|---------------------------------|-----------|---------------------------------|--|------------------------------------|---------------|--|-----------|--------------|-------------|
|                                                                         | Q1<br>(0.14-0.35<br>EU/mL)<br>n=19 |              | Q2<br>(0.36-0.50<br>EU/mL) n=23 |           | Q3<br>(0.50-1.22<br>EU/mL) n=22 |  | Q4<br>(1.35-5.45<br>EU/mL)<br>n=21 |               |  |           |              |             |
| Age (years)                                                             | 22                                 | ± 2          |                                 | 22        | ± 2                             |  | 22                                 | ± 2           |  | 22        | ± 3          | 0.95        |
| Sex, N                                                                  |                                    |              |                                 |           |                                 |  |                                    |               |  |           |              | 0.24        |
| Men                                                                     | 3                                  |              |                                 | 5         |                                 |  | 7                                  |               |  | 9         |              |             |
| Women                                                                   | 16                                 |              |                                 | 18        |                                 |  | 15                                 |               |  | 12        |              |             |
| Body composition parameters                                             |                                    |              |                                 |           |                                 |  |                                    |               |  |           |              |             |
| BMI (kg/m <sup>2</sup> )                                                | 23.5<br>4                          | ± 5.34       |                                 | 24.0<br>8 | ± 4.27                          |  | 25.7<br>3                          | ± 5.11        |  | 26.4<br>5 | ± 4.14       | 0.05        |
| FMI (kg/m <sup>2</sup> )                                                | 8.29                               | ± 3.89       |                                 | 8.69      | ± 2.83                          |  | 9.03                               | ± 3.07        |  | 9.80      | ± 2.75       | 0.33        |
| LMI (kg/m <sup>2</sup> )                                                | 13.9<br>4                          | ± 1.89       |                                 | 13.9<br>0 | ± 2.03                          |  | 15.1<br>3                          | ± 2.60        |  | 14.7<br>9 | ± 2.51       | 0.25        |
| Plasma levels of endocannabinoids and their analogues (peak area ratio) |                                    |              |                                 |           |                                 |  |                                    |               |  |           |              |             |
| AEA and related N-acylethanolamines                                     |                                    |              |                                 |           |                                 |  |                                    |               |  |           |              |             |
| AEA                                                                     | 0.15                               | ± 0.09       |                                 | 0.13      | ± 0.05                          |  | 0.14                               | ± 0.04        |  | 0.14      | ± 0.05       | 0.69        |
| AA                                                                      | 69.3<br>0                          | ± 19.65      |                                 | 64.2<br>4 | ± 21.8<br>8                     |  | 67.5<br>3                          | ± 27.45       |  | 66.6<br>2 | ± 19.62      | 0.95        |
| DHEA                                                                    | 0.07                               | ± 0.03       |                                 | 0.12      | ± 0.31                          |  | 0.06                               | ± 0.02        |  | 0.07      | ± 0.03       | 0.62        |
| DGLEA                                                                   | 0.02                               | ± 0.01       |                                 | 0.02      | ± 0.01                          |  | 0.02                               | ± 0.01        |  | 0.03      | ± 0.01       | 0.35        |
| LEA                                                                     | 0.25                               | ± 0.15       |                                 | 0.20      | ± 0.06                          |  | 0.22                               | ± 0.07        |  | 0.21      | ± 0.07       | 0.77        |
| alpha LEA                                                               | 0.00<br>9                          | ± 0.007      |                                 | 0.00<br>8 | ± 0.00<br>4                     |  | 0.00<br>7                          | ± 0.003       |  | 0.00<br>6 | ± 0.001      | 0.75        |
| PEA                                                                     | 1.76                               | ± 0.32       |                                 | 1.71      | ± 0.21                          |  | 1.81                               | ± 0.28        |  | 1.76      | ± 0.22       | 0.64        |
| PDEA                                                                    | 0.02<br>4                          | ± 0.009      |                                 | 0.02<br>4 | ± 0.00<br>7                     |  | 0.02<br>5                          | ± 0.009       |  | 0.02<br>4 | ± 0.007      | 0.99        |
| POEA                                                                    | 0.33                               | ± 0.36       |                                 | 0.24      | ± 0.16                          |  | 0.28                               | ± 0.19        |  | 0.25      | ± 0.16       | 0.84        |
| OEA                                                                     | 0.74                               | ± 0.25       |                                 | 0.62      | ± 0.16                          |  | 0.70                               | ± 0.21        |  | 0.69      | ± 0.18       | 0.43        |
| SEA                                                                     | 1.36                               | ± 0.29       |                                 | 1.23      | ± 0.17<br>*                     |  | 1.42                               | ± 0.23*       |  | 1.27      | ± 0.22       | <b>0.04</b> |
| 2-AG and acylglycerols                                                  |                                    |              |                                 |           |                                 |  |                                    |               |  |           |              |             |
| 2-AG                                                                    | 0.00<br>8                          | ± 0.007<br>* |                                 | 0.04<br>8 | ± 0.18<br>0                     |  | 0.02<br>8                          | ± 0.032*<br>† |  | 0.00<br>8 | ± 0.006<br>† | <b>0.01</b> |
| 2-LG                                                                    | 0.03                               | ± 0.05       |                                 | 0.62      | ± 2.73                          |  | 0.18                               | ± 0.44        |  | 0.01      | ± 0.02       | 0.07        |
| 2-OG                                                                    | 0.00<br>2                          | ± 0.006      |                                 | 0.02<br>5 | ± 0.10<br>6                     |  | 0.01<br>2                          | ± 0.034       |  | 0.00<br>1 | ± 0.001      | 0.06        |
| Fecal microbiota composition (genera, %)                                |                                    |              |                                 |           |                                 |  |                                    |               |  |           |              |             |
| Bilophila                                                               | 0.41                               | ± 0.25       |                                 | 0.51      | ± 0.54                          |  | 0.53                               | ± 0.36        |  | 0.51      | ± 0.42       | 0.80        |
| Akkermansia                                                             | 3.20                               | ± 4.67       |                                 | 2.75      | ± 5.56                          |  | 1.64                               | ± 2.72        |  | 1.18      | ± 2.95       | 0.30        |
| Faecalibacterium                                                        | 5.71                               | ± 3.15       |                                 | 6.68      | ± 4.69                          |  | 6.11                               | ± 4.06        |  | 5.42      | ± 2.62       | 0.90        |
| Parasutterella                                                          | 0.72                               | ± 1.16       |                                 | 2.18      | ± 3.20                          |  | 1.28                               | ± 2.46        |  | 0.46      | ± 0.70       | 0.35        |

|                    |      |   |      |      |   |      |      |   |      |      |   |      |             |
|--------------------|------|---|------|------|---|------|------|---|------|------|---|------|-------------|
| <i>Odoribacter</i> | 0.72 | ± | 0.46 | 0.79 | ± | 0.58 | 1.14 | ± | 0.70 | 0.62 | ± | 0.28 | <b>0.04</b> |
| <i>Prevotella</i>  | 5.17 | ± | 6.60 | 3.01 | ± | 8.00 | 4.25 | ± | 7.81 | 8.11 | ± | 9.87 | 0.23        |

Data are presented as means ± standard deviations. Symbols \* and † indicate significant differences after correcting for multiple comparisons FDR. 2-AG: 2-arachidonylglycerol; 2-LG: 2-linoleoylglycerol; 2-OG: 2-oleoylglycerol; alpha LEA: alpha-Linolenoyl ethanolamide; AA: arachidonic acid; AEA: anandamide; BMI: body mass index; DGLEA: dihomo-gamma-linolenoyl ethanolamide; DHEA: docosahexaenoyl ethanolamide; EU: endotoxins units; FMI: fat mass index; HDL-C: high-density lipoprotein cholesterol; LDL-C: low-density lipoprotein cholesterol; LEA: linoleoyl ethanolamide; LMI: Lean mass index; LPS: lipopolysaccharide; OEA: oleoyl ethanolamine; PEA: palmitoyl ethanolamide; PDEA: pentadecanoyl ethanolamide; POEA: palmitoleoyl ethanolamide; Q: quartiles; SEA: stearoyl ethanolamide.
