# Supplementary material for: Plasma Levels of Endocannabinoids and Their Analogues Are Related to Specific Fecal Bacterial Genera in Young Adults: Role in Gut Barrier Integrity
Source: MDPI journal article supplement (doi:10.3390/nu14102143), 2022-05-20
Supplement: s1 [file s1]

**Table S4.** Spearman correlation of relative abundance of fecal microbiota composition at genera taxonomic level with plasma levels of lipopolysaccharide.

|                            | Genera (%)       |           |                    |           |                         |       |                       |       |                    |           |                   |           |
|----------------------------|------------------|-----------|--------------------|-----------|-------------------------|-------|-----------------------|-------|--------------------|-----------|-------------------|-----------|
|                            | <i>Bilophila</i> |           | <i>Akkermansia</i> |           | <i>Faecalibacterium</i> |       | <i>Parasutterella</i> |       | <i>Odoribacter</i> |           | <i>Prevotella</i> |           |
|                            | rho              | P         | rho                | P         | rho                     | P     | rho                   | P     | rho                | P         | rho               | P         |
| LPS<br>N=85<br>(EU/mL<br>) | 0.02<br>1        | 0.85<br>1 | -<br>0.15<br>3     | 0.16<br>2 | -0.044                  | 0.692 | -<br>0.085            | 0.439 | 0.04<br>3          | 0.69<br>7 | 0.04<br>6         | 0.67<br>5 |

Spearman's correlations coefficient (rho) and P-values (P) obtained from univariate Spearman correlation analyses are provided. EU: endotoxins units; LPS: lipopolysaccharide.
