# Supplementary material for: Plasma Levels of Endocannabinoids and Their Analogues Are Related to Specific Fecal Bacterial Genera in Young Adults: Role in Gut Barrier Integrity
Source: MDPI journal article supplement (doi:10.3390/nu14102143), 2022-05-20
Supplement: s1 [file s1]

**Table S1.** Partial Spearman correlation of plasma levels of AEA and related N-acylethanolamines with plasma levels of lipopolysaccharide adjusted for body mass index.

| <i>AEA and related N-acylethanolamines<br/>(peak area ratio)</i> |            |       |            |       |       |       |       |       |                |           |                |           |           |           |                |           |                |           |                |           |                |           |
|------------------------------------------------------------------|------------|-------|------------|-------|-------|-------|-------|-------|----------------|-----------|----------------|-----------|-----------|-----------|----------------|-----------|----------------|-----------|----------------|-----------|----------------|-----------|
|                                                                  | AEA        |       | AA         |       | DHEA  |       | DGLEA |       | LEA            |           | Alpha LEA      |           | PEA       |           | PDEA           |           | POEA           |           | OEA            |           | SEA            |           |
|                                                                  | rho        | P     | rho        | P     | rho   | P     | rho   | P     | rho            | P         | rho            | P         | rho       | P         | rho            | P         | rho            | P         | rho            | P         | rho            | P         |
| LPS<br>N=85<br>(EU/mL)                                           | -<br>0.035 | 0.740 | -<br>0.001 | 0.989 | 0.050 | 0.635 | 0.039 | 0.716 | -<br>0.09<br>2 | 0.38<br>5 | -<br>0.08<br>9 | 0.40<br>1 | 0.03<br>8 | 0.71<br>8 | -<br>0.04<br>0 | 0.70<br>4 | -<br>0.01<br>8 | 0.86<br>7 | -<br>0.05<br>7 | 0.59<br>4 | -<br>0.06<br>7 | 0.52<br>6 |

Correlation analyses were performed adjusting for body mass index. Spearman's correlations coefficient (rho) and P-values (P) obtained from univariate Spearman correlation analyses are provided. alpha LEA: alpha-Linolenoyl ethanolamide; AA: arachidonic acid; AEA: anandamide; DGLEA: dihomo-gamma-linolenoyl ethanolamide; DHEA: docosahexaenoyl ethanolamide; EU: endotoxins units; LEA: linoleoyl ethanolamide; LPS: lipopolysaccharide; OEA: oleoyl ethanolamine; PEA: palmitoyl ethanolamide; PDEA: pentadecanoyl ethanolamide; POEA: palmitoleoyl ethanolamide; SEA: stearoyl ethanolamide.
